# Supplementary material for: Molecular investigations of the prenucleation mechanism of bone-like apatite assisted by type I collagen nanofibrils: insights into intrafibrillar mineralization
Source: Royal Society of Chemistry journal article supplement (doi:10.1039/d2cp02573f), 2022-01-01
Supplement: d2cp02573f1.pdf [file d2cp02573f1.pdf]

**Supporting Information**

for

**Molecular Investigations of the Prenucleation Mechanism of Bone-like Apatite Assisted by  
Type I Collagen Nanofibrils: Insights into Intrafibrillar Mineralization**

Zhiyu Xue, Xin Wang and Dingguo Xu\*

MOE Key Laboratory of Green Chemistry and Technology, College of Chemistry, Sichuan  
University, Chengdu, Sichuan, 610064 PR China

\* To whom correspondence should be addressed: [dgxu@scu.edu.cn](mailto:dgxu@scu.edu.cn) (D.X), Tel: 86-28-85406156.

## Contents

|                                                                                                                                                                                                                                                                                                                                                                 |     |
|-----------------------------------------------------------------------------------------------------------------------------------------------------------------------------------------------------------------------------------------------------------------------------------------------------------------------------------------------------------------|-----|
| <b>Supporting Information</b> .....                                                                                                                                                                                                                                                                                                                             | I   |
| Figure S1. Definition of the bending angle in the collagen fibril structure.....                                                                                                                                                                                                                                                                                | S1  |
| Figure S2. The kink angle of collagen fibrils during the 300ns molecular dynamics relaxation. ....                                                                                                                                                                                                                                                              | S2  |
| Figure S3. Ramachandran diagram for the collagen fibril structure. ....                                                                                                                                                                                                                                                                                         | S3  |
| Figure S4. Distribution of the hydrogen bond density in the collagen fibril model. (A) for H-bonds within the single collagen fibrils, (B) for H-bonds between the collagen fibrils .....                                                                                                                                                                       | S4  |
| Figure S5. Evolution along the dynamic time course for the whole collagen fibril model.....                                                                                                                                                                                                                                                                     | S5  |
| Figure S6. Evolution along the dynamic time course for the $\text{Ca}^{2+}$ and $\text{HPO}_4^{2-}$ ions present in the isolated collagen model environment.....                                                                                                                                                                                                | S6  |
| Figure S7. (A) Snapshot of the collagen prenucleation process of the one more replica calculation after 30 ns. (B) Cluster size distributions for the collagen fibrils. (C) Evolution of the nucleation probability for the Glu-Arg, Asp-Lys, Glu-Asp, and Lys-Arg pairs.....                                                                                   | S7  |
| Figure S8. Cluster density distribution in the 67 nm D-periodicity of the one more replica calculation of collagen microfibrils (black line for calculated value, red line for experimental value).....                                                                                                                                                         | S8  |
| Figure S9. Evolution along the dynamic time course (0, 2, 4, 8, 10, 20, and 30 ns) for the $\text{Ca}^{2+}$ and $\text{HPO}_4^{2-}$ ions that belong to the clusters formed in the gap region of the a–e band collagen fibrils. The a-bands are colored silver, while the while e-bands are colored yellow. ....                                                | S9  |
| Figure S10. Snapshot of the collagen fibrils in an aqueous solution of the $\text{HPO}_4^{2-}/\text{PO}_4^{3-}$ ions after 30 ns of molecular dynamics simulations.....                                                                                                                                                                                         | S10 |
| Figure S11. Proportions of the various amino acids present in human type I collagen. ....                                                                                                                                                                                                                                                                       | S11 |
| Figure S12. (A) Snapshot of the collagen prenucleation process with the pure $\text{PO}_4^{3-}$ after 30 ns. (B) The stoichiometry of two biggest clusters are $[\text{Posner}]_{\sim 57}$ for $\text{Ca}_{519}(\text{PO}_4)_{353}(\text{OH})_{57}$ and $[\text{Posner}]_{\sim 45}$ for $\text{Ca}_{401}(\text{PO}_4)_{271}(\text{OH})_{23}$ respectively. .... | S12 |
| Figure S13. The view of arrangement of collagen fibrillar structure from the gap region. ....                                                                                                                                                                                                                                                                   | S13 |
| Table S1. Definitions of the models obtained using a combination of various anions in the solution phase. The corresponding ion concentrations are provided for each model .....                                                                                                                                                                                | S14 |
| Table S2. All types and proportions of the H-bonds within the single collagen fibrils .....                                                                                                                                                                                                                                                                     | S15 |
| Table S3. All types and proportions of the H-bonds between the collagen fibrils.....                                                                                                                                                                                                                                                                            | S16 |

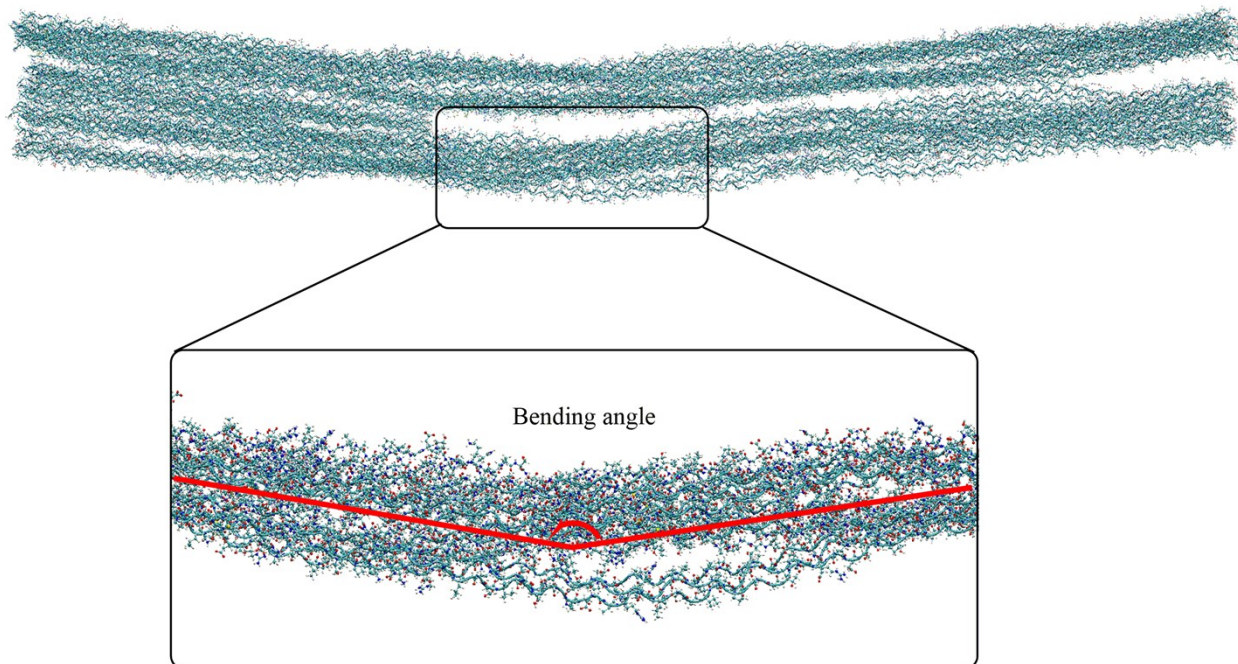

**Figure S1.** Definition of the bending angle in the collagen fibril structure.

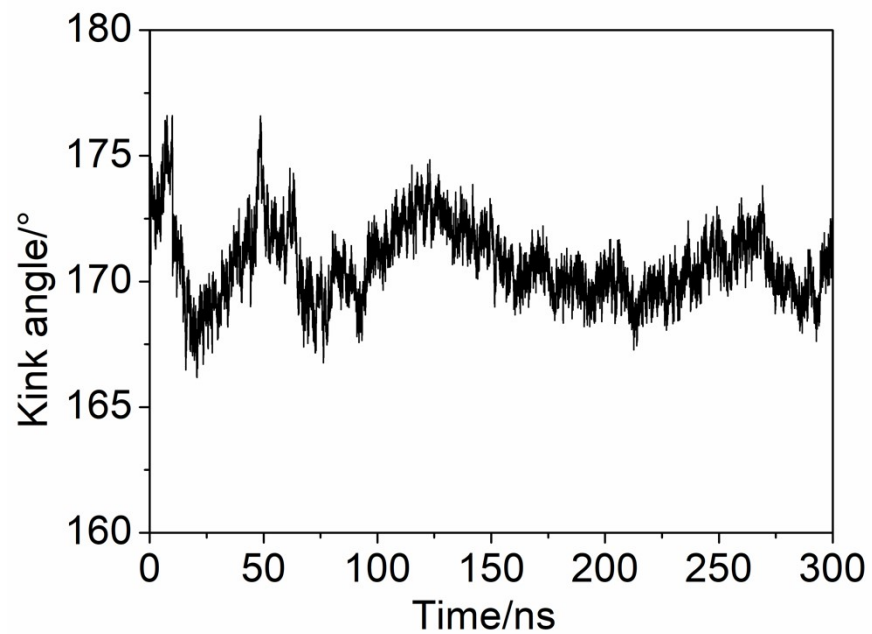

**Figure S2.** The kink angle of collagen fibrils during the 300ns molecular dynamics relaxation.

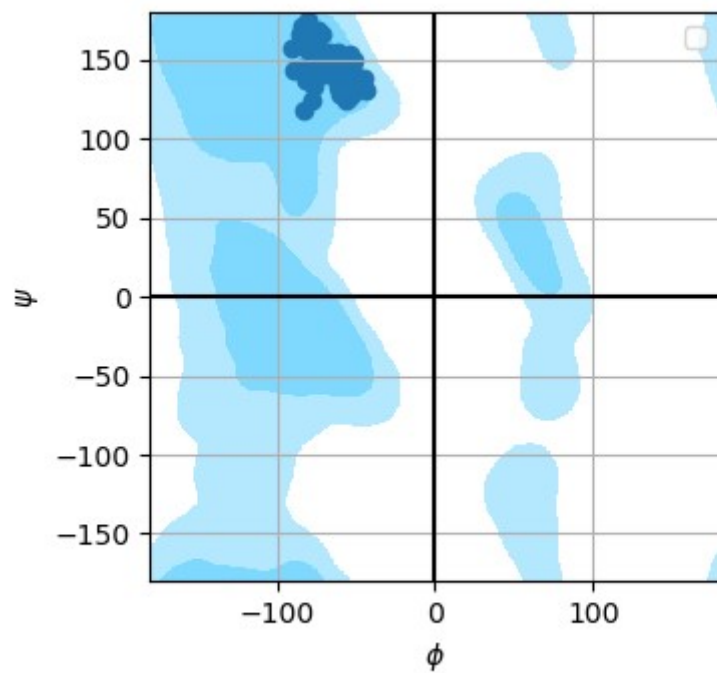

**Figure S3.** Ramachandran diagram for the collagen fibril structure.

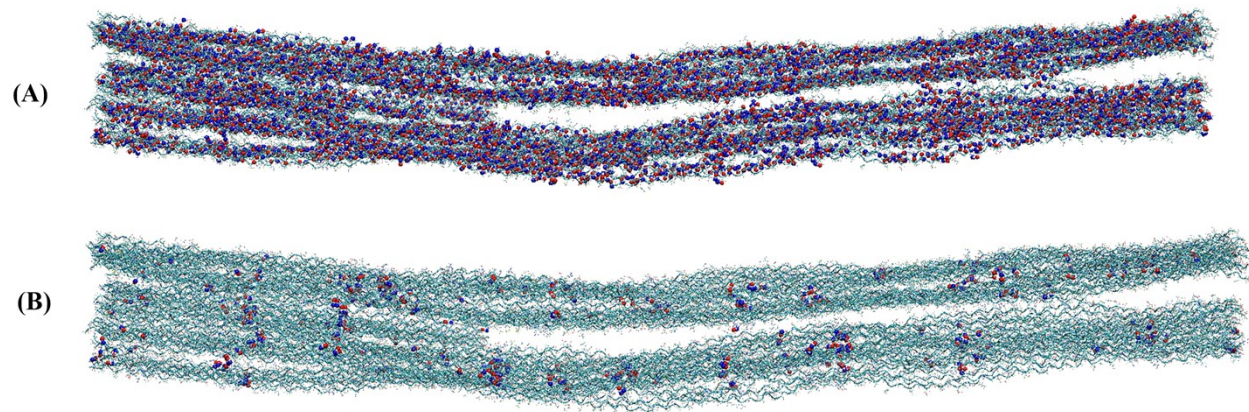

**Figure S4.** Distribution of the hydrogen bond density in the collagen fibril model. (A) for H-bonds within the single collagen fibrils, (B) for H-bonds between the collagen fibrils

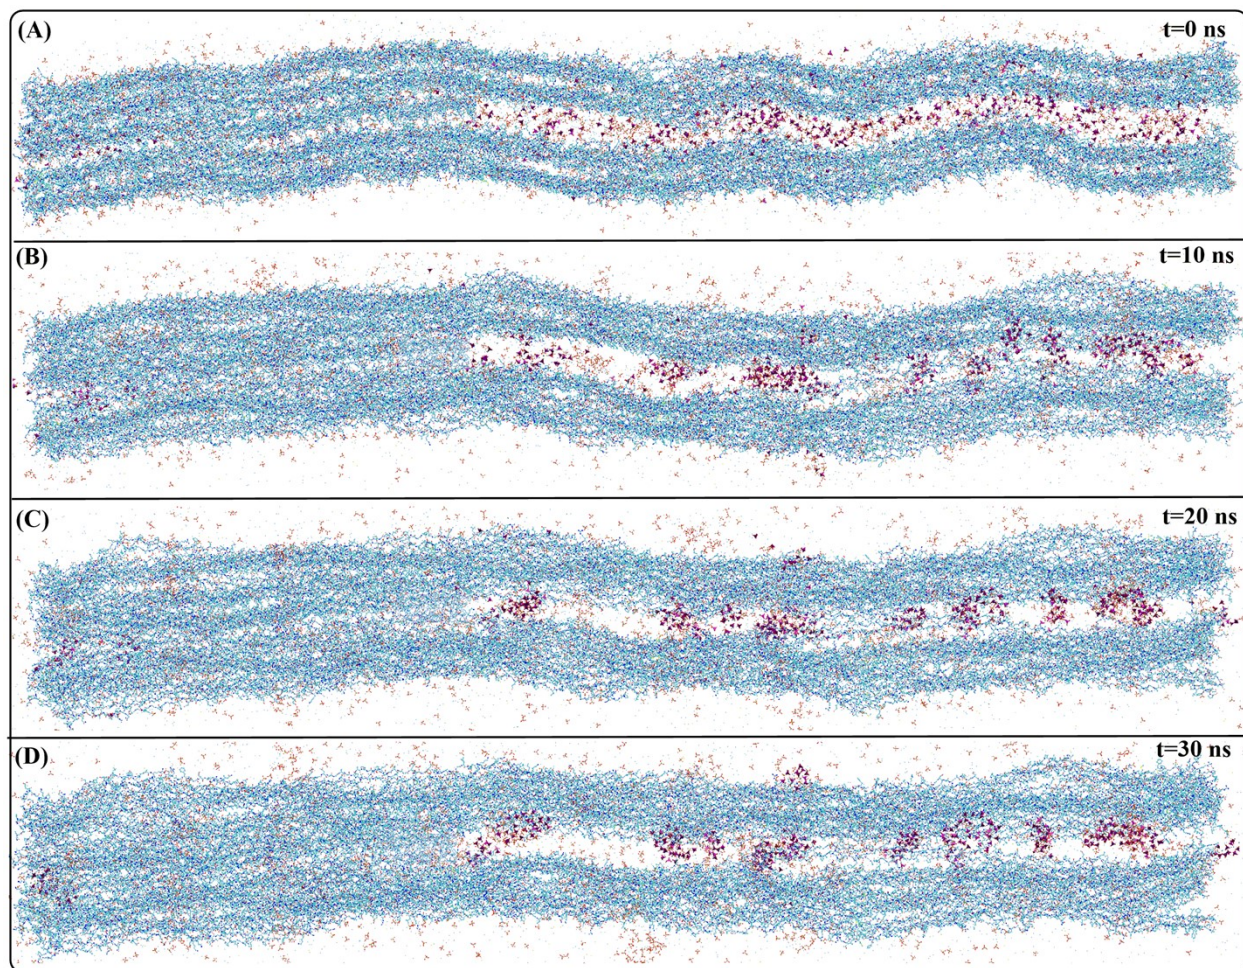

**Figure S5.** Evolution along the dynamic time course for the whole collagen fibril model.

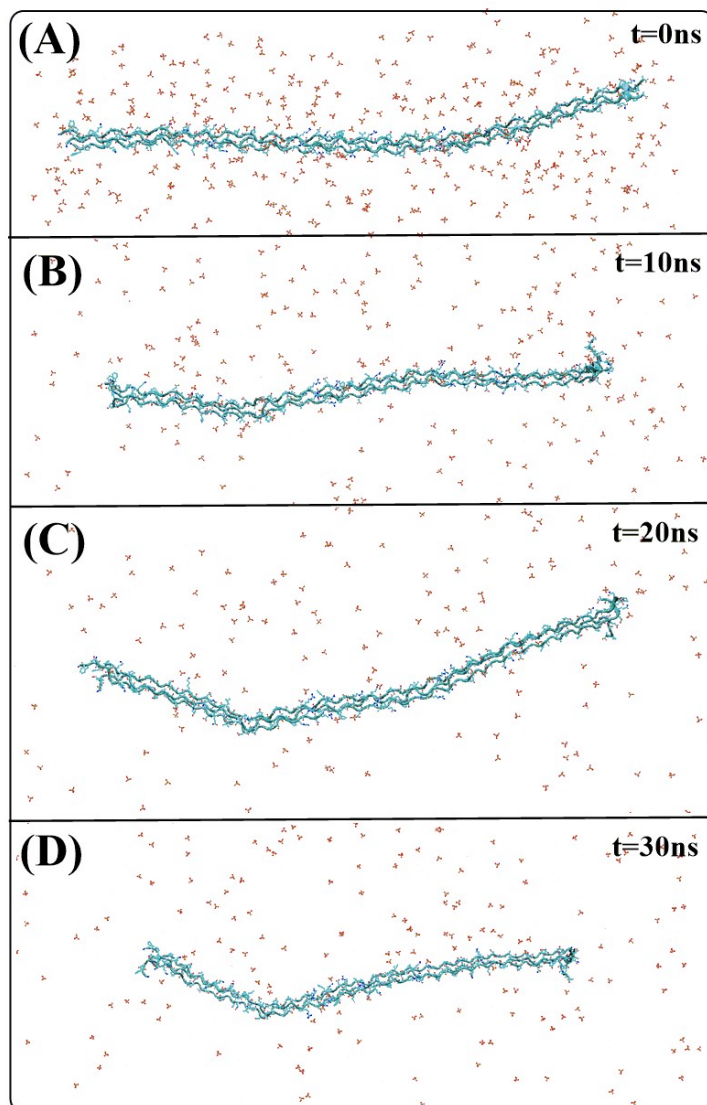

**Figure S6.** Evolution along the dynamic time course for the  $\text{Ca}^{2+}$  and  $\text{HPO}_4^{2-}$  ions present in the isolated collagen model environment.



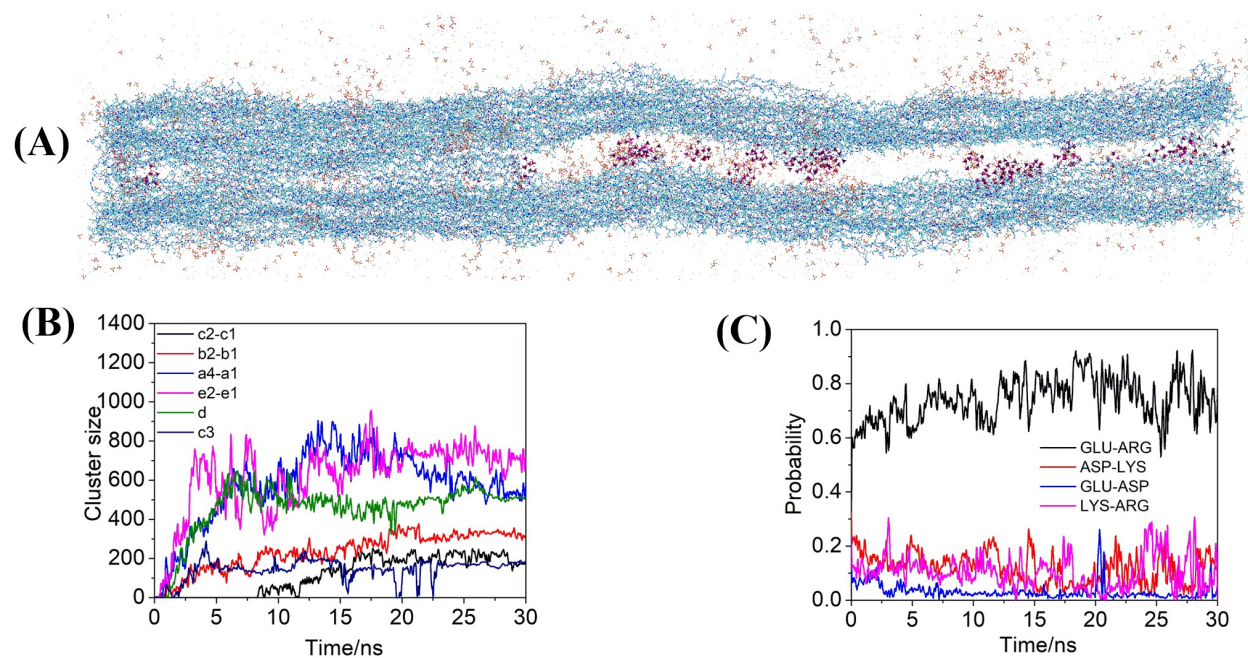

**Figure S7.** (A) Snapshot of the collagen prenucleation process of the one more replica calculation after 30 ns. (B) Cluster size distributions for the collagen fibrils. (C) Evolution of the nucleation probability for the Glu-Arg, Asp-Lys, Glu-Asp, and Lys-Arg pairs.

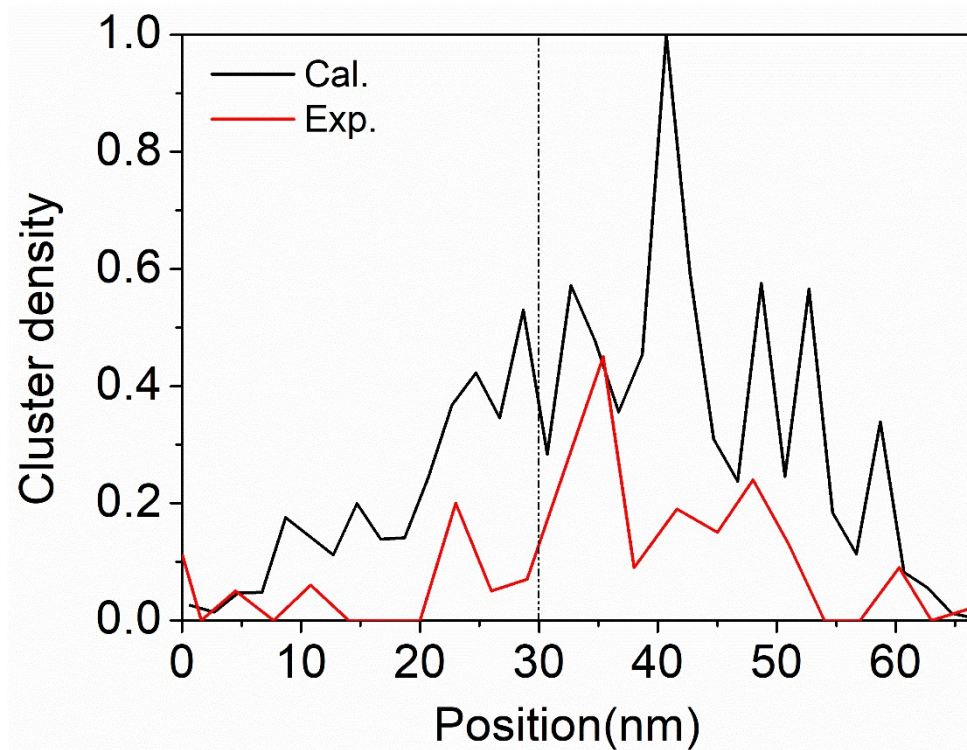

**Figure S8.** Cluster density distribution in the 67 nm D-periodicity of the one more replica calculation of collagen microfibrils (black line for calculated value, red line for experimental value).

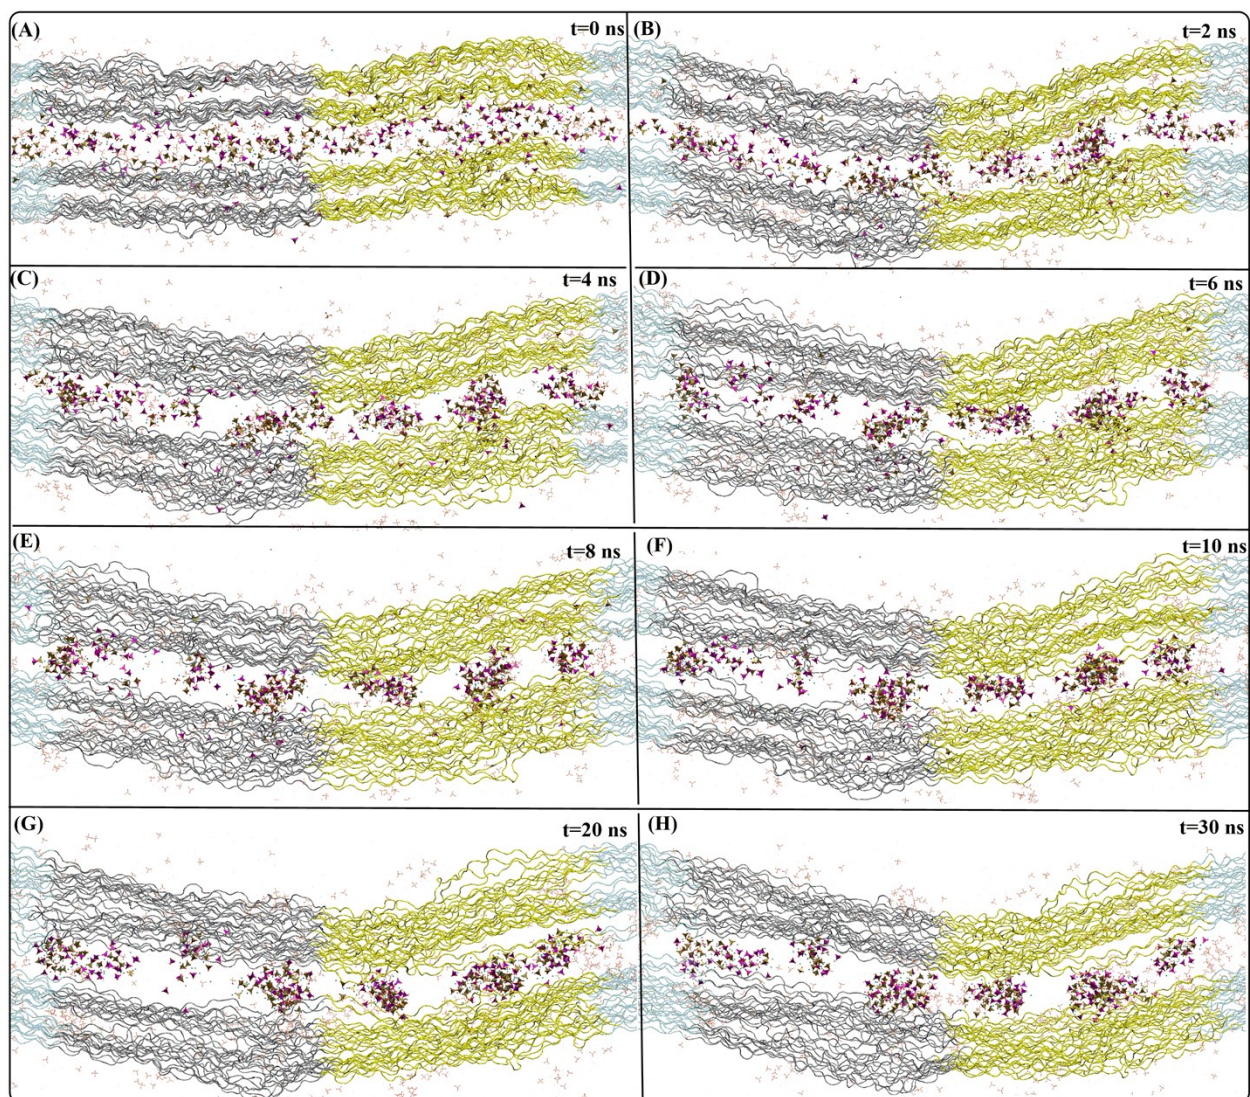

**Figure S9.** Evolution along the dynamic time course (0, 2, 4, 8, 10, 20, and 30 ns) for the  $\text{Ca}^{2+}$  and  $\text{HPO}_4^{2-}$  ions that belong to the clusters formed in the gap region of the a–e band collagen fibrils. The a-bands are colored silver, while the while e-bands are colored yellow.

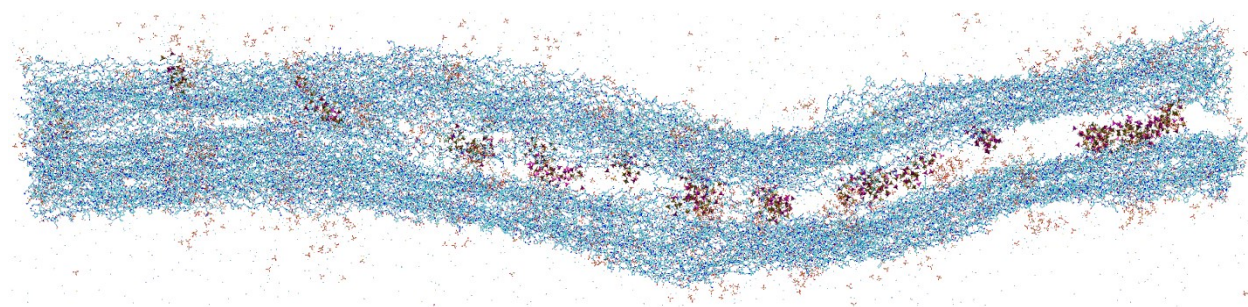

**Figure S10.** Snapshot of the collagen fibrils in an aqueous solution of the  $\text{HPO}_4^{2-}/\text{PO}_4^{3-}$  ions after 30 ns of molecular dynamics simulations.

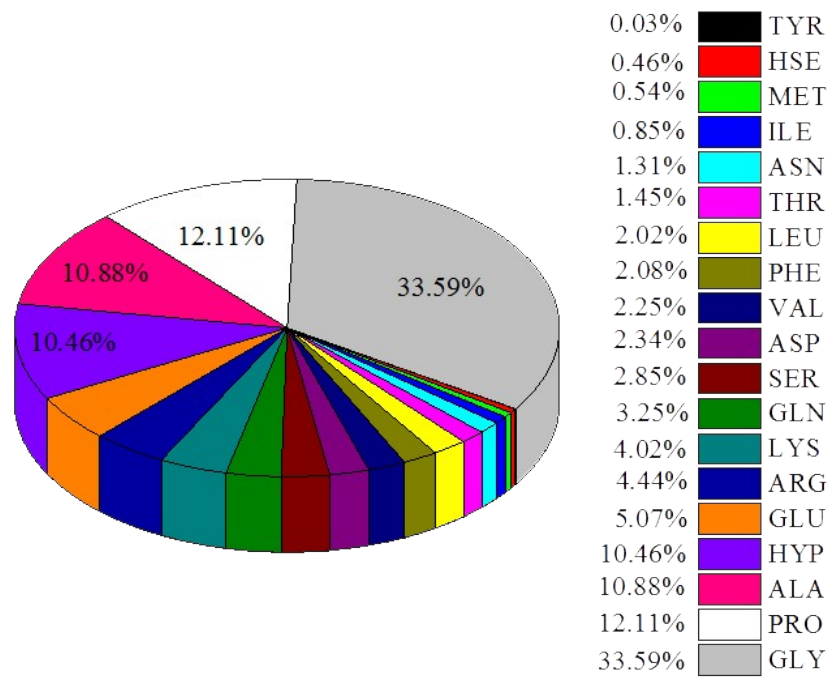

**Figure S11.** Proportions of the various amino acids present in human type I collagen.

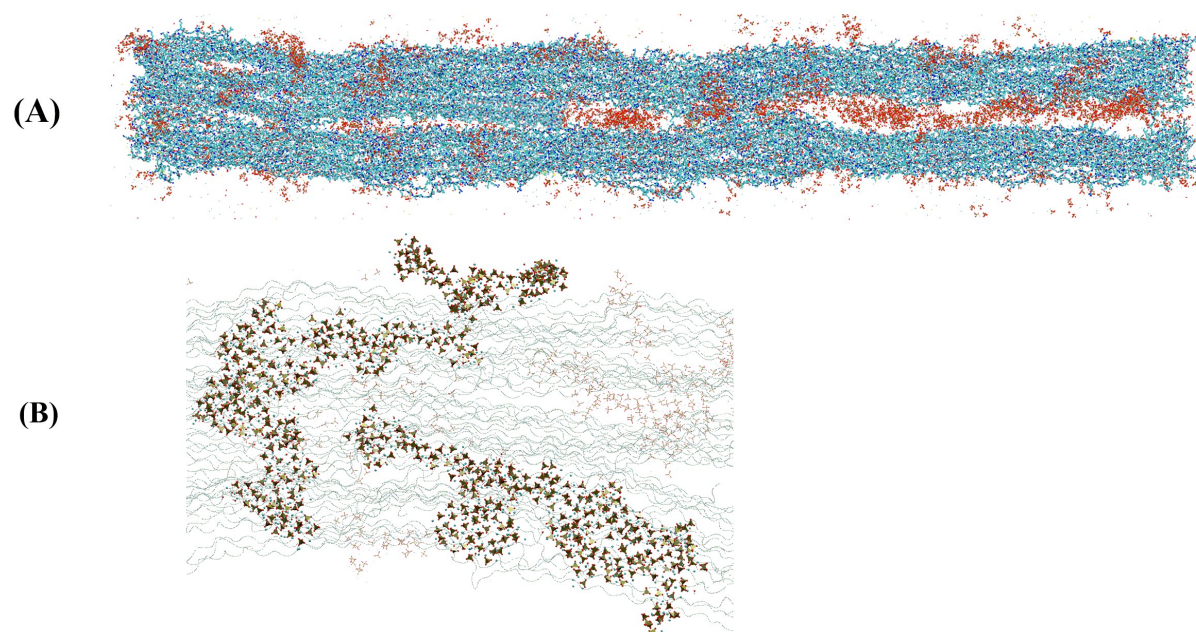

**Figure S12.** (A) Snapshot of the collagen prenucleation process with the pure  $\text{PO}_4^{3-}$  after 30 ns. (B) The stoichiometries of two biggest clusters are  $[\text{Posner}]_{-57}$  for  $\text{Ca}_{519}(\text{PO}_4)_{353}(\text{OH})_{57}$  and  $[\text{Posner}]_{-45}$  for  $\text{Ca}_{401}(\text{PO}_4)_{271}(\text{OH})_{23}$  respectively.

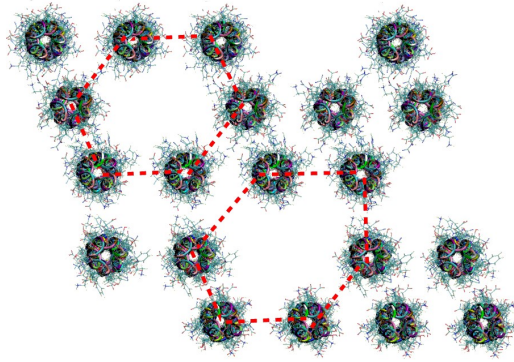

**Figure S13.** The view of arrangement of collagen fibrillar structure from the gap region.

**Table S1.** Definitions of the models obtained using a combination of various anions in the solution phase. The corresponding ion concentrations are provided for each model

| Anion composition        | Concentration (M) |                  |                 |            |            |
|--------------------------|-------------------|------------------|-----------------|------------|------------|
|                          | $C_{Ca^{2+}}$     | $C_{HPO_4^{2-}}$ | $C_{PO_4^{3-}}$ | $C_{Na^+}$ | $C_{Cl^-}$ |
| $HPO_4^{2-}$             | 0.7               | 0.42             | -               | 0.1        | 0.66       |
| $HPO_4^{2-} + PO_4^{3-}$ | 0.7               | 0.21             | 0.21            | 0.1        | 0.45       |



**Table S2.** All types and proportions of the H-bonds within the single collagen fibrils

|               |          |               |          |               |          |
|---------------|----------|---------------|----------|---------------|----------|
| GLY:N---PRO:O | 0.238347 | LEU:N---HYP:O | 0.001887 | ASN:N---ALA:O | 0.000377 |
| GLY:N---ALA:O | 0.132289 | GLN:N---ALA:O | 0.001887 | GLN:N---LEU:O | 0.000377 |
| GLY:N---GLU:O | 0.10568  | ALA:N---HYP:O | 0.001698 | GLU:N---GLY:O | 0.000377 |
| GLY:N---LEU:O | 0.051519 | LYS:N---ILE:O | 0.001698 | SER:O---PRO:O | 0.000189 |
| ARG:N---ARG:O | 0.050009 | GLU:N---ASN:O | 0.001698 | HIS:N---HIS:N | 0.000189 |
| GLY:N---SER:O | 0.037743 | LYS:N---ARG:O | 0.00151  | VAL:N---GLU:O | 0.000189 |
| GLY:N---ASP:O | 0.031515 | GLN:N---ASP:O | 0.00151  | THR:O---GLY:O | 0.000189 |
| GLY:N---LYS:O | 0.027175 | GLU:N---GLU:O | 0.001321 | SER:N---ASP:O | 0.000189 |
| GLY:N---PHE:O | 0.024344 | LYS:N---SER:O | 0.001321 | ASN:N---HIS:N | 0.000189 |
| GLY:N---VAL:O | 0.024156 | ARG:N---THR:O | 0.001132 | SER:N---GLY:O | 0.000189 |
| LYS:N---GLU:O | 0.02208  | GLN:N---GLU:O | 0.001132 | VAL:N---HYP:O | 0.000189 |
| ARG:N---GLU:O | 0.021702 | THR:N---GLU:O | 0.001132 | GLN:N---HIS:N | 0.000189 |
| GLY:N---ARG:O | 0.019815 | ALA:N---ASP:O | 0.001132 | SER:N---ASN:O | 0.000189 |
| ARG:N---ASP:O | 0.018117 | GLY:N---TYR:O | 0.000944 | GLY:N---HYP:O | 0.000189 |
| GLY:N---ASN:O | 0.017928 | LYS:N---ALA:O | 0.000944 | VAL:N---PRO:O | 0.000189 |
| LYS:N---ASP:O | 0.016984 | SER:N---GLU:O | 0.000944 | SER:O---HYP:O | 0.000189 |
| GLY:N---GLN:O | 0.015097 | GLN:N---ARG:O | 0.000944 | SER:N---HIS:N | 0.000189 |
| ARG:N---HYP:O | 0.012833 | ARG:N---LEU:O | 0.000944 | LEU:N---VAL:O | 0.000189 |
| GLY:N---ILE:O | 0.011512 | LEU:N---ASP:O | 0.000755 | ASP:N---HYP:O | 0.000189 |
| GLN:N---GLN:O | 0.009624 | PHE:N---HYP:O | 0.000755 | GLY:N---HIS:N | 0.000189 |
| GLY:N---HIS:O | 0.009436 | ARG:N---PRO:O | 0.000566 | THR:N---HYP:O | 0.000189 |
| GLY:N---THR:O | 0.007926 | ASN:N---HYP:O | 0.000566 | ASN:N---GLY:O | 0.000189 |
| ARG:N---LYS:O | 0.005473 | LEU:N---ASN:O | 0.000566 | THR:O---HYP:O | 0.000189 |
| ARG:N---ALA:O | 0.005095 | GLN:N---THR:O | 0.000566 | LYS:N---GLY:O | 0.000189 |
| GLY:N---GLY:O | 0.004718 | LYS:N---GLN:O | 0.000566 | SER:O---ALA:O | 0.000189 |
| ARG:N---SER:O | 0.00434  | ASN:N---SER:O | 0.000377 |               |          |
| ASN:N---ASP:O | 0.004152 | THR:N---ASN:O | 0.000377 |               |          |
| LYS:N---LYS:O | 0.003963 | SER:O---GLU:O | 0.000377 |               |          |
| GLY:N---MET:O | 0.003774 | ALA:N---ASN:O | 0.000377 |               |          |
| LYS:N---HYP:O | 0.003586 | HIS:N---ASN:O | 0.000377 |               |          |
| ARG:N---VAL:O | 0.003397 | ASN:N---GLU:O | 0.000377 |               |          |
| GLN:N---HYP:O | 0.002831 | ALA:N---GLU:O | 0.000377 |               |          |
| ARG:N---GLN:O | 0.002642 | HYP:O---GLU:O | 0.000377 |               |          |
| GLU:N---HYP:O | 0.002642 | SER:O---GLY:O | 0.000377 |               |          |
| ARG:N---ASN:O | 0.002453 | GLN:N---HIS:O | 0.000377 |               |          |
| ARG:N---GLY:O | 0.002453 | LYS:N---THR:O | 0.000377 |               |          |
| LYS:N---ASN:O | 0.002265 | ASP:N---ASN:O | 0.000377 |               |          |
| SER:N---HYP:O | 0.002076 | ASP:N---ASP:O | 0.000377 |               |          |

**Table S3.** All types and proportions of the H-bonds between the collagen fibrils

|               |           |               |           |
|---------------|-----------|---------------|-----------|
| ARG:N---GLU:O | 0.3882682 | LYS:N---GLY:O | 0.0027933 |
| LYS:N---GLU:O | 0.1480447 | ARG:N---ASN:O | 0.0027933 |
| ARG:N---ASP:O | 0.1480447 | VAL:N---GLN:O | 0.0027933 |
| ARG:N---GLY:O | 0.0446927 | THR:N---ASP:O | 0.0027933 |
| LYS:N---ASP:O | 0.0391061 | ARG:N---ALA:O | 0.0027933 |
| ARG:N---HYP:O | 0.0251397 | ASN:N---ARG:O | 0.0027933 |
| SER:N---GLU:O | 0.0223464 | SER:N---GLN:O | 0.0027933 |
| GLN:N---HYP:O | 0.0195531 | ARG:N---VAL:O | 0.0027933 |
| GLN:N---GLY:O | 0.0111732 | THR:N---GLU:O | 0.0027933 |
| GLY:N---GLU:O | 0.0083799 | ASN:N---ASN:O | 0.0027933 |
| ASN:N---HYP:O | 0.0083799 | THR:N---PRO:O | 0.0027933 |
| HYP:N---GLY:O | 0.0083799 | HIS:N---GLY:O | 0.0027933 |
| LYS:N---HYP:O | 0.0055866 | ALA:N---ASN:O | 0.0027933 |
| ALA:N---GLN:O | 0.0055866 | ALA:N---HYP:O | 0.0027933 |
| MET:N---HYP:O | 0.0055866 | SER:N---GLY:O | 0.0027933 |
| ALA:N---GLY:O | 0.0055866 | SER:N---HYP:O | 0.0027933 |
| ALA:N---SER:O | 0.0055866 | ARG:N---ILE:O | 0.0027933 |
| SER:N---ASP:O | 0.0055866 | ILE:N---HYP:O | 0.0027933 |
| LYS:N---ASN:O | 0.0055866 |               |           |
| VAL:N---ASN:O | 0.0027933 |               |           |
| ASP:N---HYP:O | 0.0027933 |               |           |
| ARG:N---SER:O | 0.0027933 |               |           |
| GLN:N---GLU:O | 0.0027933 |               |           |
| GLN:N---SER:O | 0.0027933 |               |           |
| HYP:N---ASP:O | 0.0027933 |               |           |
| GLN:N---ARG:O | 0.0027933 |               |           |
| THR:N---HYP:O | 0.0027933 |               |           |
| ASP:N---GLU:O | 0.0027933 |               |           |
| GLN:N---GLN:O | 0.0027933 |               |           |
| HIS:N---GLU:O | 0.0027933 |               |           |
| LYS:N---GLN:O | 0.0027933 |               |           |
| ASN:N---GLU:O | 0.0027933 |               |           |
| ASN:N---GLY:O | 0.0027933 |               |           |
